# Microsnop: a generalist tool for the unbiased representation of heterogeneous microscopy images

## Authors

Dejin Xun<sup>1</sup>, Rui Wang<sup>2\*</sup>, Xingcai Zhang<sup>3\*</sup>, Yi Wang<sup>1,4,5\*</sup>

## Affiliations

1. Pharmaceutical Informatics Institute, College of Pharmaceutical Sciences, Zhejiang University, Hangzhou, Zhejiang 310058, China

2. State Key Lab of CAD&CG, Zhejiang University, Hangzhou, Zhejiang 310058, China

3. John A. Paulson School of Engineering and Applied Sciences, Harvard University, Cambridge, MA, USA

4. Innovation Institute for Artificial Intelligence in Medicine of Zhejiang University, Hangzhou, Zhejiang 310018, China

5. State Key Laboratory of Component-based Chinese Medicine, Tianjin University of Traditional Chinese Medicine, Tianjin 300193, China

\*Corresponding author. Email: [zjuwangyi@zju.edu.cn](mailto:zjuwangyi@zju.edu.cn) (Y.W.); [xingcai@mit.edu](mailto:xingcai@mit.edu) (X.C.Z.); [ruiwang@zju.edu.cn](mailto:ruiwang@zju.edu.cn) (R.W.)

## Abstract

Automated and accurate profiling of microscopy images from small-scale to high-throughput is becoming an essential procedure in basic and applied biological research. Here, we present Microsnop, a novel deep learning-based representation tool trained on large-scale microscopy images using masked self-supervised learning, which eliminates the need for manual annotation. Microsnop is able to unbiasedly profile a wide range of complex and heterogeneous images, including single-cell, fully-imaged and batch-experiment data. We evaluated the performance of Microsnop using seven high-quality datasets, containing over 358,000 images and 1,270,000 single cells with varying resolutions and channels from cellular organelles to tissues. Our results demonstrate Microsnop's robustness and state-of-the-art performance in all biological applications, outperforming previous generalist and even custom algorithms. Furthermore, we presented its potential contribution for multi-modal studies. Microsnop is highly inclusive of GPU and CPU capabilities, and can be freely and easily deployed on local or cloud computing platforms.

## MAIN TEXT

### Introduction

Automated quantitative profiling of microscopy images has become increasingly prevalent in a wide range of biological studies, from small-scale to high-throughput research<sup>1</sup>. Visual phenotype or image representation, which entails profiling rich information from images, has proven to be beneficial in various areas of biology<sup>2</sup>, such as identifying protein localization<sup>3</sup>, classifying cell cycle stages<sup>4</sup>, predicting mechanisms of action (MoA)<sup>5</sup>, and high-content drug discovery<sup>6</sup>. Moreover, the growth of spatial omics has triggered new demand for the quantification of microscopy images. For instance, spatial proteomics technologies can image more than 50 disease-related proteins in a single tissue slice<sup>7</sup>, while spatial transcriptomics allow for the simultaneous acquisition of image data and transcriptional profiles<sup>8</sup>. These advancements

46 necessitate the development of a high-performance, generalist representation tool that is capable  
47 of handling heterogeneous microscopy images.

48 The profiling of microscopy images has been traditionally performed through extracting  
49 predefined morphological features, such as intensity, shape, texture, granularity, and  
50 colocalization<sup>9-10</sup>. However, these engineered features have limitations, including low  
51 computational efficiency, potential information loss, and sensitivity to image quality<sup>11</sup>. To address  
52 these deficiencies, recent advances in computer vision and deep learning have led to the  
53 development of learning-based feature extraction methods using representation learning, which  
54 involves pre-training a model on pretext tasks and then using part of the network as a feature  
55 extractor for downstream analysis. These methods can be divided into two categories: task-  
56 oriented custom methods and generalist methods. Task-oriented methods<sup>4, 12-15</sup> are pre-trained on  
57 data from the same source and developed specifically for biological research like cell cycle stage  
58 prediction. On the other hand, generalist methods require training data that are not focused on a  
59 particular biological problem. One of the most commonly used approaches is using models  
60 trained for ImageNet<sup>16</sup> (a natural image classification task), which continues to be used in recent  
61 multi-modal research<sup>17</sup>. However, whether the extent to which the feature extraction patterns are  
62 learned from natural images is sufficient for capturing the subtle phenotypes of microscopy  
63 images has not been fully validated by comparative research. In an effort to better match the  
64 feature domain to downstream microscopy image profiling tasks, the CytoImageNet<sup>18</sup> study was  
65 conducted, where image representation was learned based on a microscopy image classification  
66 task (890K images, 894 classes). Although this study demonstrated comparable performance to  
67 ImageNet, it still relied on the supervised learning approach that can be labor-intensive, prone to  
68 biases from semantic annotations, and potentially increase the difficulty to achieve higher  
69 representation performance.

70 The development of a high-performance, unbiased, generalist image representation tool can  
71 significantly increase the potential for advancement in the field of microscopy image analysis.  
72 Beyond facilitating accurate downstream analysis, such a tool would enable unsupervised analysis  
73 for identifying new phenotypes. It can facilitate the separation of feature extraction and  
74 downstream analysis process, allowing for downstream analysis conducted on computers with  
75 limited computing power. The representations of images that are much smaller than the original  
76 images can be easily stored and transferred, and private data can be shared securely through these  
77 representations without disclosing the original images. In addition, secondary analysis becomes  
78 possible, such as the creation of large image databases or joint analysis with other data  
79 representations. However, despite the above potential advantages, the complexity and diversity of  
80 microscopy images presents significant challenges in this tool development process.

81 Self-supervised representation learning offers the prospect of unbiased image representation  
82 by allowing the model to learn directly from the pixels without relying on pre-defined semantic  
83 annotations. This approach involves applying a transformation step to the original images and  
84 training the model to learn the mapping between the transformed and the original image.  
85 Transformation can take various forms, such as a direct copy<sup>19</sup>, partial channel drop<sup>20</sup>, or image  
86 masking<sup>21</sup>, with masked visual representation learning being a particularly popular method in  
87 natural image studies<sup>22-24</sup>. Furthermore, recent advances in cell segmentation algorithms have  
88 indicated that networks trained on generalized data can possess remarkable generalization  
89 ability<sup>25-27</sup>. Despite these promising developments, there are several challenges to tackle to  
90 develop a universal tool for microscopy image profiling. These include handling images with  
91 varying resolutions and channel numbers (such as 1, 2, 3, 5 and 56)<sup>3-4, 7, 26, 28</sup>; requiring a single  
92 model to learn joint representation patterns for multiple image styles; processing various image  
93 types such as single-cell or fully-imaged images; or addressing technical variations in high-  
94 content experiments which may introduce batch effects in the feature space<sup>29-30</sup>.

95 In this study, we present Microsnoop, a generalist tool for the unbiased representation of  
96 microscopy images based on masked self-supervised learning. Our pipeline was designed to  
97 handle heterogeneous images and includes a task distribution module to support users with  
98 different levels of computing power. To accommodate a broad range of image profiling needs, we  
99 have categorized images into three types and developed corresponding pipelines. We evaluated  
100 the performance of Microsnoop using seven evaluation datasets from diverse biological studies,  
101 comparing it to both generalist and custom algorithms. The results demonstrate the powerful  
102 feature extraction ability of Microsnoop and its potential for the analysis of multi-modal  
103 biological data. Our tool is freely available at <https://github.com/cellimnet/microsnoop-publish>.

## 106 **Results**

### 107 **The design of a generalist representation tool.**

108 It has been proved that a large and diverse dataset is beneficial for the training of generalist  
109 models. Herein, we collected and curated 10458 high-quality microscopy images published by the  
110 cell segmentation community<sup>25-27, 31-33</sup>. These images were taken using different technologies and  
111 have different resolutions and channel numbers, with channels ranging from cellular organelles to  
112 tissues. The four main types of images include fluorescence, phase-contrast, tissue and  
113 histopathology images (Fig. 1a(i) and Supplementary Table 1). To accommodate the variable  
114 number of image channels, the input to the neural network was set as one-channel images (related  
115 to one-channel feature concatenation strategy below). All images channels in the training set were  
116 split out and further selected to form a one-channel data pool (Methods). Before training, images  
117 in each batch were preprocessed in three steps: (1) Sample: randomly select one batch of images  
118 from the four types in turn to reduce the effects of unequal amounts of data; (2) Augment:  
119 randomly crop a 224\*224 region (pad if smaller) from each image, then normalize, random rotate  
120 and scale the image, with the result serving as the network target; (3) Transform: randomly mask  
121 a portion of the target image patches, with the result serving as the network input. In terms of  
122 network architecture design, this study employed a CNN-based<sup>34</sup> (convolution neural network)  
123 architecture, despite the growing interest in Transformer-based architectures<sup>35</sup> for natural image  
124 analysis. This choice was motivated by the superior performance observed for the CNN  
125 architecture in our preliminary evaluations (Extended Data Fig. 1 and Methods). This  
126 performance disparity may be attributed to the difference in the amount of training data provided.  
127 Typically, the pre-training of a ViT architecture<sup>36</sup> requires a large corpus of data, with over 1  
128 million or even 1 billion images used in the case of natural image studies<sup>21</sup>. However, our  
129 microscopy image dataset involved a relatively smaller set of training data, which may not have  
130 been sufficient to provide adequate training for the Transformer-based architecture.

131 We employed a masked self-supervised learning strategy to train the network, where a  
132 randomly selected percentage of image patches are masked and used as inputs. The network was  
133 then tasked with reconstructing the original, unmasked images. During training, masked images  
134 are encoded into high-level features through four consecutive downsampling steps, and the  
135 process of image reconstruction is accomplished through mirror-symmetric upsampling (Fig.  
136 1a(ii)). The learning process is guided by minimizing the self-supervision loss function (Methods),  
137 which promotes the model to learn useful features that enable it to recover the masked parts of the  
138 images based on the information present in the remaining parts. This is a challenging task, which  
139 necessitates a comprehensive understanding that transcends simple low-level image statistics.

140 At test time, a generalist tool needs to face a range of image processing needs. To cater for  
141 this condition, we chose to categorize images based on the image profiling process itself, rather  
142 than solely on their biological applications that may be limited in scope. Our categorization  
143 comprises three types: single-cell images, fully-imaged images, and batch-experiment images.

(Fig. 1b(i)). The images to be processed are first managed by an in-built task distribution module (below), and then fed into the pre-trained encoder on a batch-by-batch basis for feature extraction. The output smallest convolutional maps are processed through global average pooling to produce initial 256-dimensional feature embeddings. Subsequently, feature aggregation is performed in accordance with different profiling tasks (details provided below). The final image representations can be used for various downstream analyses (Fig. 1b(ii)).

### **Diversified evaluation datasets.**

In prior studies, attention was primarily focused on a limited number of specific datasets<sup>5, 37-39</sup>. In our work, to give a more comprehensive evaluation of our generalist tool, we collected and curated 7 evaluation datasets, encompassing commonly used datasets along with some novel additions, comprising over 358,000 images and 1,270,000 single cells (Methods and Extended Data Fig. 2). These images showcase a diverse array of characteristics, including various resolutions, image types, number of channels, and biological applications, such as protein localization estimation, cell cycle stage identification, and MoA prediction (Supplementary Table 2). In our study, four of the seven evaluation datasets focused on single-cell images. The performance of the model on fluorescent images, including bright-field channels, was assessed by COOS7 Test 1-4<sup>39</sup>, CYCLOPs<sup>3</sup> and BBBC048<sup>4</sup>. For the assessment of the model's ability to handle more challenging histopathology images, we employed the CoNSEP<sup>40</sup> dataset. The LIVECell Test<sup>26</sup> and TissueNet Test<sup>27</sup> datasets were designed to evaluate a model's performance on fully-imaged image classification tasks, involving phase-contrast and tissue image representation, respectively. Lastly, the BBBC021<sup>41</sup> dataset was employed to evaluate the representation ability of the model for batch-experiment images.

### **Microsnop accurately reconstructs the masked input images.**

In the investigation of optimal mask ratio for learning features from microscopy images, we found that a 25% mask was optimal for this task. This was determined by testing 8 different mask ratios (5%, 15%, 25%, 35%, 45%, 55%, 65% and 75%) and comparing the results (Extended Data Fig. 3). To get a qualitative sense of the reconstruction task, we showed an example of each image type from the validation set (Fig. 2a). By inputting the 25% masked image into the pre-trained network, we were able to produce a reconstructed image that closely resembles the original, with only some detailed textures lost. This level of detail recovery is not easily achievable by humans. The reconstruction results on single-cell images from the evaluation datasets were even more impressive, with the reconstructed image being nearly indistinguishable from the original image (Fig. 2b and Extended Data Fig. 4). The improved performance on single-cell images in comparison to fully-imaged ones can be attributed to cellular heterogeneity, which results in diverse cell phenotypes. The abundance of reference information from single-cell images allows for the more successful recovery of a limited number of instances. These results demonstrate that the pre-trained Microsnop network, has learned good representations of the microscopy images.

### **Microsnop profile of single-cell images with one-channel feature concatenation.**

Single-cell images can be produced directly by an imaging instrument such as imaging flow cytometry (IFC)<sup>42</sup>, or obtained through cell segmentation processing on fully-imaged images. To accommodate the variable number of channels, we devised a one-channel feature concatenation strategy (Fig. 3a). Each channel of the multi-channel image is processed independently by Microsnop, and the resulting embeddings are concatenated in an orderly manner. To prevent confusion during processing, a unique index is assigned to each image when multiple images are being processed. To address potential memory overflow issues when processing large batches of

193 data, we established a task distribution module. This module efficiently manages image pathways  
194 and distributes images for processing, read into the CPU and transferred to the GPU as needed.  
195 The user is empowered to optimize performance by adjusting parameters according to the  
196 available memory capacity of both the CPU and GPU. Furthermore, our system features a  
197 scalable, distributed design, which is capable of supporting multiple GPUs, providing a solution  
198 for increasing data demands.

199 In our benchmark, we included three previously developed generalist methods in the  
200 comparisons: EfficientNetB0<sup>43</sup>, Inception V3<sup>44</sup>, CytoImageNet<sup>18</sup>, and custom methods that are  
201 accessible (Methods). For the COOS7 Test 1-4, CYCLOPs and CoNSEP, we evaluated  
202 performance with the K-Nearest Neighbor (KNN) classification accuracy (match between  
203 prediction and ground truth using the KNN classifier, which has been utilized in prior study<sup>18</sup>).  
204 For the dataset BBBC048, we used fivefold cross-validation for dataset split and evaluated the  
205 performance with the multilayer perceptron (MLP) classification accuracy (match between  
206 prediction and ground truth using the MLP classifier, as employed in the original paper<sup>4</sup>). Our  
207 evaluations revealed the exceptional performance of Microsnoop, which consistently  
208 outperformed all other methods. In the majority of cases, Microsnoop achieved significant  
209 improvements of more than 6%, and up to 10% (Fig. 3b-f). Notably, for the 7-classification task  
210 of BBBC048, Microsnoop achieved an accuracy of 85.62% without using any data from the  
211 dataset, surpassing the custom supervised learning algorithm in the original paper by 5.02%.

### 212 **Microsnoop profile of fully-imaged images with cell region cropping.**

214 Fully-imaged images are a common format directly obtained from most microscopes. Cell  
215 segmentation is usually the first step of phenotype profiling due to the inherent heterogeneity of  
216 cells. Although various generalist segmentation algorithms<sup>25-27</sup> have been developed along with  
217 some fine-tuning strategies<sup>45-46</sup>, they may still introduce unwanted segmentation errors. For  
218 instance, in a large drug screening experiment, cell body images can present a range of  
219 phenotypes, and a segmentation algorithm may perform well on some but poorly on others  
220 (Extended Data Fig. 5a), potentially leading to unpredictable impacts on downstream analysis. To  
221 mitigate these issues, we introduced a cell region cropping strategy, where the segmentation  
222 algorithm is applied only on the easiest channel, such as the nucleus channel, which presents more  
223 robust segmentation results (Extended Data Fig. 5b). Cell regions are computed and cropped  
224 based on the segmentation masks and rescale constant (Fig. 4a(i) and Methods). Then,  
225 Microsnoop extracts features from the cropped single-cell images as described above (Fig. 4a(ii)).  
226 Finally, the resulting single-cell level embeddings are aggregated by computing their mean to  
227 obtain the fully-imaged level representations (Fig. 4a(iii)).

228 We evaluated the representation ability of Microsnoop on two fully-imaged image phenotype  
229 classification tasks, and tested previously mentioned generalist algorithms for comparison. Both  
230 tasks were evaluated using the KNN classification accuracy. The results showed that Microsnoop  
231 again outperformed other methods, and even a 41.93% improvement was obtained on the  
232 LIVECell Test dataset (Fig. 4b-c). Furthermore, Microsnoop showed strong inclusiveness to  
233 various image styles, with an accuracy of 98.08% on the LIVECell Test dataset and 96.64% on  
234 TissueNet Test.

### 236 **Microsnoop profile of batch-experiment images with sphering batch correction.**

237 In high-content screening experiments, batch effects due to technical variability can affect  
238 downstream analysis<sup>29-30, 37-38</sup> (Fig. 5a). To address this issue, we employed a sphering batch  
239 correction method<sup>47</sup>. This assumes that the large variations observed in negative controls are  
240 associated with confounders, and any variation that is not observed in controls is associated with  
241 phenotypes. Sphering transformation aims to separate phenotypic variation from confounders. In

our image representation pipeline for batch-experiment images, Microsnoop first extracts features from the fully-imaged images (as described above), and the resulting fully-imaged level representations are corrected via sphering transformation (Fig. 5b). Finally, the fully-imaged level representations are aggregated to treatment level representations by computing their mean (Fig. 5c).

We evaluated the representation ability of Microsnoop on the classic BBBC021 dataset, while including previously reported results of generalist and custom methods in the comparisons. We assessed the performance with the Not-Same-Compound (NSC) and Not-Same-Compound-or-Batch (NSCB) KNN classification accuracy. Microsnoop still achieved state-of-the-art performance without using any data from the dataset, even if compared with the methods exclusively studied on it (Fig. 5d-e).

### **Two other fully-imaged image profile modes and the robustness of cell region cropping mode.**

In addition to the cell region cropping mode, we provided two alternative modes for processing fully-imaged datasets: rescaling and tile mode. In the rescaling mode, the shape of the fully-imaged images is directly rescaled to the input size (224\*224) as inputs (Extended Data Fig. 6a-b). In the tile mode, the original image is cropped into multiple 224x224 tiles, and the fully-imaged level representations are aggregated by computing the mean over all tiles (Extended Data Fig. 6c). We evaluated the performance of these three processing modes, including different rescale constants for the cell region cropping mode, on both the fully-imaged and batch-experiment datasets (Extended Data Fig. 6d-g and Methods). The rescaling and tile modes outperformed the single-cell mode on LIVECell and TissueNet tests; however, both modes displayed a significant performance decline on the BBBC021 dataset. The reason for the underperformance of the rescaling mode could be attributed to the fact that it discards high-resolution phenotypic information during the rescaling process. On the other hand, the decline in performance observed with the tile mode may be due to the fact that it averages out important subtle phenotype variations present in certain regions of fully-imaged images. In contrast, the cell region cropping mode displayed robust performance across a range of parameters on all three datasets. Although the single-cell mode is more robust and efficient, it requires more time and memory compared to the other two modes. (Extended Data Fig. 6h-i).

### **Microsnoop improves the performance of the multi-modal structured embedding algorithm.**

A recent study of the multi-modal structured embedding algorithm (MUSE<sup>17</sup>) has shown impressive results for the integrative spatial analysis of image and transcriptional data. The authors conducted a simulation experiment to assess the performance of MUSE when transcriptional data quality is degraded. Here, we focused on the impact of image feature quality, and the results of our simulation experiment showed that with the quality improvement of image representations, the performance of MUSE can also be significantly improved (Extended Data Fig. 7). Next, we tested Microsnoop on the real-world dataset seqFISH+<sup>8</sup> in comparison with the representation method used in the original paper. After acquiring the image representations, we use principal component analysis (PCA) performing feature dimensionality reduction to match the latent space dimensions of MUSE (Fig. 6a). We employed the silhouette coefficient<sup>48</sup> to evaluate the feature quality. Microsnoop demonstrated better image representation quality and greater improvement in the performance of MUSE (Fig. 6b).

## **Discussion**

289 Advances in imaging technology, such as phase-contrast microscopy, imaging flow  
290 cytometry, automated high-throughput microscopy and microscopy combined with spatial omics  
291 techniques have created a massive demand to solve the complex challenge of microscopy image  
292 representation. In this study, we present Microsnoop, an innovative deep learning tool that  
293 effectively addresses this challenge. The accurate analysis of heterogeneous microscopy images,  
294 as a critical aspect of both fundamental and applied biological research, is highly valued by the  
295 microscopy image analysis community<sup>49-50</sup>. Our proposed solution offers promising  
296 advancements to this field. Microsnoop was trained on large-scale high-quality data using a  
297 masked self-supervised pretext task, allowing it to learn valuable and unbiased features for image  
298 representation. The one-channel feature concatenation strategy, efficient task distribution module,  
299 and rational classification mode of profiling needs make our tool flexible to meet various user  
300 needs. In addition, Microsnoop is capable of processing complex fully-imaged images through  
301 cell region cropping and mitigating batch effects in batch-experiment images through sphering  
302 transformation. For fully-imaged images, our results show that the single-cell analysis mode is  
303 more robust compared to other modes, reinstating the importance of considering cellular  
304 heterogeneity in biological research. Our benchmark results demonstrate robust and state-of-the-  
305 art performance on all evaluated datasets, eliminating the need to use of any evaluation data for  
306 fine-tuning. Furthermore, the enhanced representation of unimodal image data leads to significant  
307 improvements in the performance of multi-modal algorithms.

308 In our methodology experiments, we found that a mask ratio of 25% is optimal for  
309 microscopy images, which is significantly lower than the 75% that has been found optimal for  
310 natural images<sup>21</sup>. The difference is primarily due to the smaller size and erratic content of  
311 instances in microscopy images, which may result in lost information if too much reference  
312 information is masked. Compared with the CytoImageNet<sup>18</sup> study that utilized a supervised  
313 classification task as the pretext task, our masked self-supervised learning approach only requires  
314 raw images without any manual annotation and yields unbiased and more capable representations.  
315 Recently, a similar self-supervised representation learning study has also been reported as useful  
316 in learning the representations of protein subcellular location images through a pretext task that  
317 requires the network to directly reconstruct original images and images corresponding to similar  
318 proteins having similar representations<sup>19</sup>. In contrast, the uniqueness of our method is that ours do  
319 not require domain-specific knowledge and is developed for generalist image representation. Our  
320 benchmark study has shown that a single network is capable of handling heterogeneous  
321 microscopy images, which is in line with the conclusion reached in the sister domain of cell  
322 segmentation<sup>25</sup>. Furthermore, our pretext task was trained on the same network structure as  
323 Cellpose. This is reminiscent of the recent success of large pre-trained language models in the  
324 field of natural language processing<sup>51-53</sup>. With continued advancements in the understanding of  
325 computer vision and the further development of models for microscopy image representation and  
326 other image processing tasks, such as cell segmentation, it may be possible to merge these models  
327 into a single, unified model in the future.

328 While Microsnoop is a powerful tool, there are several areas for improvement. For example,  
329 further evaluation is needed to determine the efficacy of our approach of one-channel feature  
330 concatenation and feature aggregation in 3D and time-series imaging datasets in comparison to  
331 training a network to directly extract spatial or temporal information. To enhance the capabilities  
332 of Microsnoop, future work could include incorporating additional self-supervised pretext tasks  
333 for multi-task learning, optimizing the quality of the training dataset and refining the single-cell  
334 level feature aggregation methods. Moreover, the current training images are still limited in size  
335 compared to natural images, and a larger training data volume combined with the Transformer  
336 architecture can be studied to improve the performance. Last but not least, deploying our model  
337 on mobile devices to aid rapid detection could be a valuable application scenario<sup>54</sup>.

338 Overall, we have developed an impressive, generalist tool for microscopy image  
339 representation. We anticipate its positive impact on the microscopy image analysis community,  
340 facilitating new phenotype discovery, data sharing, and the establishment of large image  
341 databases, among other benefits. Furthermore, we envision that Microsnoop can be effectively  
342 utilized in multi-modal studies such as combining molecular and image representation for MoA  
343 prediction<sup>55-56</sup> or exploring the relationship between gene expression and image representation for  
344 drug discovery<sup>57</sup>.



## References

1. Caicedo, J. C., Singh, S. & Carpenter, A. E. Applications in image-based profiling of perturbations. *Curr. Opin. Biotechnol.* **39**, 134-142 (2016).
2. Pratapa, A., Doron, M. & Caicedo, J. C. Image-based cell phenotyping with deep learning. *Curr. Opin. Chem. Biol.* **65**, 9-17 (2021).
3. Lu, A. X. et al. Integrating images from multiple microscopy screens reveals diverse patterns of change in the subcellular localization of proteins. *eLife* **7**, e31872 (2018).
4. Eulenberg, P. et al. Reconstructing cell cycle and disease progression using deep learning. *Nat. Commun.* **8**, 463 (2017).
5. Pawlowski, N., Caicedo, J. C., Singh, S., Carpenter, A. E. & Storkey, A. Automating Morphological Profiling with Generic Deep Convolutional Networks. Preprint at <http://biorxiv.org/lookup/doi/10.1101/085118> (2016).
6. Cuccarese, M. F. et al. Functional immune mapping with deep-learning enabled phenomics applied to immunomodulatory and COVID-19 drug discovery. Preprint at <http://biorxiv.org/lookup/doi/10.1101/2020.08.02.233064> (2020).
7. Schürch, C. M. et al. Coordinated Cellular Neighborhoods Orchestrate Antitumoral Immunity at the Colorectal Cancer Invasive Front. *Cell* **182**, 1341-1359 (2020).
8. Eng, C.-H. L. et al. Transcriptome-scale super-resolved imaging in tissues by RNA seqFISH+. *Nature* **568**, 235-239 (2019).
9. Carpenter, A. E. et al. CellProfiler: image analysis software for identifying and quantifying cell phenotypes. *Genome Biol.* **7**, R100 (2006).
10. Pau, G., Fuchs, F., Sklyar, O., Boutros, M. & Huber, W. EBImage--an R package for image processing with applications to cellular phenotypes. *Bioinformatics* **26**, 979-981 (2010).
11. Singh, S., Bray, M.-A., Jones, T. R. & Carpenter, A. E. Pipeline for illumination correction of images for high-throughput microscopy. *J. Microsc.* **256**, 231-236 (2014).
12. Caicedo, J. C., McQuin, C., Goodman, A., Singh, S. & Carpenter, A. E. Weakly Supervised Learning of Single-Cell Feature Embeddings. In *Proc. IEEE Conference on Computer Vision and Pattern Recognition* 9309-9318 (IEEE, 2018).
13. Lu, A. X., Kraus, O. Z., Cooper, S. & Moses, A. M. Learning unsupervised feature representations for single cell microscopy images with paired cell inpainting. *PLoS Comput. Biol.* **15**, e1007348 (2019).
14. Adnan, M., Kalra, S. & Tizhoosh, H. R. Representation Learning of Histopathology Images Using Graph Neural Networks. In *Proc. IEEE Conference on Computer Vision and Pattern Recognition* 988-989 (IEEE, 2020).
15. Perakis, A. et al. Contrastive Learning of Single-Cell Phenotypic Representations for Treatment Classification. In *Machine Learning in Medical Imaging* (eds. Lian, C., Cao, X., Rekić, I., Xu, X. & Yan, P.) **12966**, 565-575 (Springer, 2021).
16. Russakovsky, O. et al. ImageNet Large Scale Visual Recognition Challenge. *Int. J. Comput. Vis.* **115**, 211-252 (2015).
17. Bao, F. et al. Integrative spatial analysis of cell morphologies and transcriptional states with MUSE. *Nat. Biotechnol.* **40**, 1200-1209 (2022).
18. Hua, S. B. Z., Lu, A. X. & Moses, A. M. CytoImageNet: A large-scale pretraining dataset for bioimage transfer learning. In *Proc. Advances in Neural Information Processing Systems* (Curran Associates, 2021).
19. Kobayashi, H., Cheveralls, K. C., Leonetti, M. D. & Royer, L. A. Self-supervised deep learning encodes high-resolution features of protein subcellular localization. *Nat. Methods* **19**, 995-1003 (2022).
20. Wong, D. R. et al. Trans-channel fluorescence learning improves high-content screening for Alzheimer's disease therapeutics. *Nat. Mach. Intell.* **4**, 583-595 (2022).
21. He, K. et al. Masked Autoencoders Are Scalable Vision Learners. In *Proc. IEEE Conference*

- 396 *on Computer Vision and Pattern Recognition* 16000-16009 (IEEE, 2022).
- 397 22. Liu, X., Zhou, J., Kong, T., Lin, X. & Ji, R. Exploring Target Representations for Masked  
398 Autoencoders. Preprint at <https://arxiv.org/abs/2209.03917> (2022).
- 399 23. Li, Z. et al. MST: Masked Self-Supervised Transformer for Visual Representation. In *Proc.*  
400 *Advances in Neural Information Processing Systems 35* (Curran Associates, 2021).
- 401 24. Wei, C. et al. Masked Feature Prediction for Self-Supervised Visual Pre-Training. In *Proc.*  
402 *IEEE Conference on Computer Vision and Pattern Recognition* 14668-14678 (IEEE, 2022).
- 403 25. Stringer, C., Wang, T., Michaelos, M. & Pachitariu, M. Cellpose: a generalist algorithm for  
404 cellular segmentation. *Nat. Methods* **18**, 100-106 (2021).
- 405 26. Edlund, C. et al. LIVECell-A large-scale dataset for label-free live cell segmentation. *Nat.*  
406 *Methods* **18**, 1038-1045 (2021).
- 407 27. Greenwald, N. F. et al. Whole-cell segmentation of tissue images with human-level  
408 performance using large-scale data annotation and deep learning. *Nat. Biotechnol.* **40**, 555-  
409 565 (2021).
- 410 28. Bray, M.-A. et al. Cell Painting, a high-content image-based assay for morphological profiling  
411 using multiplexed fluorescent dyes. *Nat. Protoc.* **11**, 1757-1774 (2016).
- 412 29. Leek, J. T. et al. Tackling the widespread and critical impact of batch effects in high-  
413 throughput data. *Nat. Rev. Genet.* **11**, 733-739 (2010).
- 414 30. Lin, A. & Lu, A. X. Incorporating knowledge of plates in batch normalization improves  
415 generalization of deep learning for microscopy images. In *Proc. International Conference on*  
416 *Machine Learning* 74-93 (PMLR, 2022).
- 417 31. Kumar, N. et al. A Multi-Organ Nucleus Segmentation Challenge. *IEEE Trans. Med. Imaging.*  
418 **39**, 1380-1391 (2020).
- 419 32. Verma, R. et al. MoNuSAC2020: A Multi-Organ Nuclei Segmentation and Classification  
420 Challenge. *IEEE Trans. Med. Imaging.* **40**, 3413-3423 (2021).
- 421 33. Amgad, M. et al. NuCLS: A scalable crowdsourcing, deep learning approach and dataset for  
422 nucleus classification, localization and segmentation. *Gigascience* **11**, giac037 (2022).
- 423 34. Ronneberger, O., Fischer, P. & Brox, T. U-Net: Convolutional Networks for Biomedical  
424 Image Segmentation. In *Proc. International Conference on Medical Image Computing and*  
425 *Computer-Assisted Intervention* 234-241 (Springer, 2015).
- 426 35. Vaswani, A. et al. Attention is All you Need. In *Proc. Advances in Neural Information*  
427 *Processing Systems 30* (Curran Associates, 2017).
- 428 36. Dosovitskiy, A. et al. An Image is Worth 16x16 Words: Transformers for Image Recognition  
429 at Scale. In *International Conference on Learning Representations (ICLR, 2021)*.
- 430 37. Ando, D. M., McLean, C. Y. & Berndl, M. Improving Phenotypic Measurements in High-  
431 Content Imaging Screens. Preprint at <http://biorxiv.org/lookup/doi/10.1101/161422> (2017).
- 432 38. Bray, M.-A. et al. High-content cellular screen image analysis benchmark study. Preprint at  
433 <https://www.biorxiv.org/content/10.1101/2022.05.15.491989v1.abstract> (2022).
- 434 39. Lu, A. et al. The Cells Out of Sample (COOS) dataset and benchmarks for measuring out-of-  
435 sample generalization of image classifiers. In *Proc. Advances in Neural Information*  
436 *Processing Systems 32* (Curran Associates, 2019).
- 437 40. Graham, S. et al. Hover-Net: Simultaneous segmentation and classification of nuclei in multi-  
438 tissue histology images. *Med. Image Anal.* **58**, 101563 (2019).
- 439 41. Caie, P. D. et al. High-Content Phenotypic Profiling of Drug Response Signatures across  
440 Distinct Cancer Cells. *Mol. Cancer Ther.* **9**, 1913-1926 (2010).
- 441 42. Schraivogel, D. et al. High-speed fluorescence image-enabled cell sorting. *Science* **375**, 315-  
442 320 (2022).
- 443 43. Tan, M. & Le, Q. V. EfficientNet: Rethinking Model Scaling for Convolutional Neural  
444 Networks. In *Proc. International Conference on Machine Learning* 6105-6114 (PMLR, 2019).
- 445 44. Szegedy, C., Vanhoucke, V., Ioffe, S., Shlens, J. & Wojna, Z. Rethinking the Inception

- 446 Architecture for Computer Vision. In *Proc. IEEE Conference on Computer Vision and Pattern*  
447 *Recognition* 2818-2826 (IEEE, 2016).
- 448 45. Xun, D. et al. Scellseg: A style-aware deep learning tool for adaptive cell instance  
449 segmentation by contrastive fine-tuning. *iScience* **25**, 105506 (2022).
- 450 46. Pachitariu, M. & Stringer, C. Cellpose 2.0: how to train your own model. *Nat. Methods* **19**,  
451 1634-1641 (2022).
- 452 47. Moshkov, N. et al. Learning representations for image-based profiling of perturbations.  
453 Preprint at <http://biorxiv.org/lookup/doi/10.1101/2022.08.12.503783> (2022).
- 454 48. Rousseeuw, P. J. Silhouettes: A graphical aid to the interpretation and validation of cluster  
455 analysis. *J. Comput. Appl. Math.* **20**, 53-65 (1987).
- 456 49. Caicedo, J. C. et al. Data-analysis strategies for image-based cell profiling. *Nat. Methods* **14**,  
457 849-863 (2017).
- 458 50. Chandrasekaran, S. N., Ceulemans, H., Boyd, J. D. & Carpenter, A. E. Image-based profiling  
459 for drug discovery: due for a machine-learning upgrade? *Nat. Rev. Drug. Discov.* **20**, 145-159  
460 (2020).
- 461 51. Devlin, J., Chang, M.-W., Lee, K. & Toutanova, K. BERT: Pre-training of Deep Bidirectional  
462 Transformers for Language Understanding. Preprint at <https://arxiv.org/abs/1810.04805>  
463 (2018).
- 464 52. Brown, T. B. et al. Language Models are Few-Shot Learners. In *Proc. Advances in Neural*  
465 *Information Processing Systems* 33 (Curran Associates, 2020).
- 466 53. Min, B. et al. Recent Advances in Natural Language Processing via Large Pre-Trained  
467 Language Models: A Survey. Preprint at <http://arxiv.org/abs/2111.01243> (2021).
- 468 54. Wang, B. et al. Smartphone-based platforms implementing microfluidic detection with image-  
469 based artificial intelligence. *Nat. Commun.* **14**, 1341 (2023).
- 470 55. Sanchez-Fernandez, A., Rumetshofer, E. & Hochreiter, S. CONTRASTIVE LEARNING OF  
471 IMAGE- AND STRUCTURE- BASED REPRESENTATIONS IN DRUG DISCOVERY. In  
472 *International Conference on Learning Representations (ICLR, 2022)*.
- 473 56. Tian, G., Harrison, P. J., Sreenivasan, A. P., Puigvert, J. C. & Spjuth, O. Combining molecular  
474 and cell painting image data for mechanism of action prediction. Preprint at  
475 <http://biorxiv.org/lookup/doi/10.1101/2022.10.04.510834> (2022).
- 476 57. Haghighi, M., Caicedo, J. C., Cimini, B. A., Carpenter, A. E. & Singh, S. High-dimensional  
477 gene expression and morphology profiles of cells across 28,000 genetic and chemical  
478 perturbations. *Nat. Methods* **19**, 1550-1557 (2022).
- 479 58. Ljosa, V., Sokolnicki, K. L. & Carpenter, A. E. Annotated high-throughput microscopy image  
480 sets for validation. *Nat. Methods* **9**, 637-637 (2012).
- 481 59. Hubert, L. & Arabie, P. Comparing partitions. *J. Classif.* **2**, 193-218 (1985).
- 482 60. Schneider, C. A., Rasband, W. S. & Eliceiri, K. W. NIH Image to ImageJ: 25 years of image  
483 analysis. *Nat. Methods* **9**, 671-675 (2012).
- 484 61. Paszke, A. et al. PyTorch: An Imperative Style, High-Performance Deep Learning Library. In  
485 *Proc. Advances in Neural Information Processing Systems* 32 (Curran Associates, 2019).
- 486

## 487 **Methods**

### 488 **Training set.**

489 The training set consisted of four diverse image types from seven published datasets:  
490 Cellpose, LIVECell, TissueNet, and Histo, which includes MoNuSeg, MoNuSAC, and NuCLS.  
491 Firstly, all channels of the images were separated. For Cellpose and TissueNet, only the cell body  
492 channel was utilized, while the original RGB images of Histo were transformed into grayscale.  
493 The original training-validation dataset split was maintained for Cellpose, LIVECell, and  
494 TissueNet, while the images from the three Histo subsets were mixed and 20% were randomly  
495 reserved for validation purposes. Finally, the training set was organized into a one-channel image  
496 data pool. A comprehensive summary of the training set can be found in Supplementary Table 1.

### 497 **Model architecture.**

498 The network architecture was based on a refined version of the classic U-Net<sup>34</sup>, as utilized in  
499 Cellpose. The standard convolutional blocks were replaced with residual blocks and style  
500 embeddings were incorporated into the concatenation stages. The downsampling scale was set as  
501 32, 64, 128 and 256, and the upsampling scale was mirror symmetry. Both the input and output  
502 tensors were of shape  $\text{batch\_size} * 1 * 224 * 224$  (in Pytorch tensor format, where  $\text{batch\_size}$  is  
503 described below).  
504

### 505 **Masked self-supervised learning.**

506 In the masked self-supervised learning approach, the network is tasked with reconstructing  
507 the original image from partial masked images. Our implementation involved dividing the target  
508 image (after normalization and augmentation) into  $16 * 16$  non-overlapping patches. Subsequently,  
509 a portion of these patches were randomly replaced with black patches of size  $16 * 16$ , where every  
510 pixel was zero. Different from the original MAE built on a Transformer architecture, the  
511 transformed patches were restored to the image format to accommodate the input format of the  
512 CNN architecture.  
513

### 514 **Model training.**

515 The self-supervision loss was set as the mean square error loss (MSE), which calculates the  
516 difference in both the masked and unmasked areas. The network was optimized by AdamW  
517 optimizer from the torch.optim Python package. In our implementation, we adopted a different  
518 definition of an epoch, in which one epoch corresponds to a complete iteration through all the  
519 sampled data, rather than through all the training data, as is commonly defined. During each  
520 epoch, we randomly sampled 12000 images from the four different types of training data in turn.  
521 The batch size was set as 16. The initial learning rate was set as 0.001, and we used a learning rate  
522 (LR) warmup trick: at the first 40 epochs, the LR was computed as:  
523

$$\text{LR} = 0.001 * \frac{\text{epoch}}{40}$$

524 after 40 epochs, the LR was computed as:

$$\text{LR} = 0.001 * 0.5 * \left[ 1 + \cos \left( \frac{\text{epoch} - 40}{\text{nepoch} - 40} * \pi \right) \right]$$

525 where  $\text{nepoch}$  represents the epoch size of the training process, here it was set as 1000.  
526

### 527 **One-channel feature concatenation strategy for multi-channel image representation.**

528 In our implementation of Microsnoop for feature extraction, we assumed that the input data  
529 comprised multi-channel images with the same number of channels, represented as  $(c, h, w)$ ,  
530 where  $c$  denotes the number of channels, and  $h$  and  $w$  denote the height and width, respectively.  
531 In the event that images had different  $h$  and  $w$ , we padded them with zeros to obtain a consistent  
532 shape. The task distribution module is then used to read the images into CPU memory, where they

533 are transformed into an array with shape  $(n, c, h, w)$ , where  $n$  denotes the number of images read.  
534 This array is then reshaped into  $(n*c, 1, h, w)$ , with each image assigned a unique index  
535 represented as a shape  $(n*c, )$  vector. For each batch of size  $b$ , the task distribution module  
536 transfers  $b$  images into the GPU memory, resulting in a tensor of shape  $(b, 1, h, w)$ . After  
537 Microsnoop processes all  $n*c$  images, the CPU cache is cleared using the collect function from  
538 the gc Python package, and the next  $n$  images are read. The resulting embedding array had the  
539 shape of  $(N*c, 256)$ , where  $N$  denotes the total number of processed images, and 256 is the pre-  
540 set dimensionality of the feature vector for a one-channel image in Microsnoop. These  
541 embeddings are then concatenated in channel to obtain a final feature embedding array of shape  
542  $(N, 256*c)$ .

## 543 **Evaluation datasets.**

544 We curated seven evaluation datasets, four of which were directly available from public  
545 sources and three (CoNSeP, LIVECell Test and TissueNet Test) were processed by us based on  
546 publicly acquired images. The summary of these datasets can be seen in Supplementary Table 2.  
547

548  
549 *COOS7*. This dataset contains 132,209 single-cell fluorescence images, including a training set  
550 and four test sets that vary in different factors. The training set consists of images from 4  
551 independent plates, while Test 1 includes randomly held-out images from the same plates as the  
552 training set, Test 2 includes images from the same plates but different wells, Test3 comprises  
553 images produced months later, and Test 4 has images produced by other instruments. The images  
554 were downloaded through the link provided by Stanley Bryan Z. Hua<sup>18</sup>. Each image takes the  
555 shape of  $2*64*64$  and is a pixel crop centered around a unique mouse cell. One channel marks the  
556 protein targeting a specific component of the cell and the other marks the nucleus. There are 7  
557 protein location classes in each set: Endoplasmic Reticulum, Inner Mitochondrial Membrane,  
558 Golgi, Peroxisomes, Early Endosome, Cytosol and Nuclear Envelope, and the evaluation task  
559 requires the model to accurately predict the protein location.

560  
561 *CYCLoPs*. This dataset consists of 28,166 single-cell fluorescence images from the CYCLoPs  
562 database, and we downloaded the data through the link provided by Stanley Bryan Z. Hua<sup>18</sup>. Each  
563 image has a shape of  $2*64*64$  and is a pixel crop centered around a unique yeast cell. One  
564 channel marks the protein location and the other marks the cytosol. There are 17 protein location  
565 classes: ACTIN, BUDNECK, BUDTIP, CELLPERIPHERY, CYTOPLASM, ENDOSOME, ER,  
566 GOLGI, MITOCHONDRIA, NUCLEARPERIPHERY, NUCLEI, NUCLEOLUS,  
567 PEROXISOME, SPINDLE, SPINDLEPOLE, VACUOLARMEMBRANE and VACUOLE. The  
568 aim of the evaluation is to accurately predict the protein localization.

569  
570 *CoNSeP*. This dataset has 41 H&E stained fully-imaged images with a shape of  $3*1000*1000$   
571 pixels. 14 of these are test images and 27 are training images. The raw data were obtained from  
572 <https://warwick.ac.uk/fac/sci/dcs/research/tia/data> and then transformed into grayscale format.  
573 Each cell was cropped based on the provided segmentation mask, resulting in 8777 single-cell test  
574 images and 15554 single-cell training images with a shape of  $1*112*112$  pixels. In cases where  
575 the cells were smaller, padding was applied to obtain the desired size. The class information was  
576 extracted from the classification mask, with 4 classes: Other, Inflammatory, Epithelial, Spindle-  
577 shaped. The evaluation task requires the model to accurately predict the cell types.

578  
579 *BBBC048*. This dataset contains 32,266 single-cell images from the Broad Bioimage Benchmark  
580 Collection<sup>58</sup>. These single-cell images of Jurkat cells were directly captured with the ImageStream  
581 imaging flow cytometer. Each image has a shape of  $3*66*66$  pixels, with a brightfield channel  
582 and two fluorescence channels. There are 7 cell phases: G1, S, G2, Prophase, Metaphase,

583 Anaphase and Telophase. Another 5-phase case considers G1, S and G2 phase as a single class.  
584 The evaluation task requires the model to accurately predict the cell cycle stages.

585

586 *LIVECell Test*. This dataset comprises 1512 fully-imaged phase-contrast images provided by  
587 Christoffer Edlund<sup>26</sup>, where each image has a shape of 1\*520\*704 pixels. There are 8 cell types:  
588 A172, BT474, BV2, Huh7, MCF7, SHSY5Y, SkBr3 and SKOV3. The evaluation task requires  
589 the model to accurately predict the cell types of full-imaged images.

590

591 *TissueNet Test*. This dataset comprises 1249 fully-imaged tissue images provided by Noah F.  
592 Greenwald<sup>27</sup>. Each image has a shape of 2\*256\*256 pixels, one channel marks the membrane or  
593 cytoplasm and the other marks the nucleus. We extracted the tissue type information from the  
594 metadata provided. There are 6 tissue types: Breast, Gi, Immune, Lung, Pancreas and Skin. The  
595 evaluation task requires the model to accurately predict the tissue types of full-imaged images.

596

597 *BBBC021*. This dataset includes 3848 fully-imaged fluorescence images, a subset from the Broad  
598 Bioimage Benchmark Collection<sup>58</sup>. The images are of MCF-7 breast cancer cells with a collection  
599 of 113 small molecules at different concentrations and a DMSO negative control. Each image has  
600 a shape of 3\*1024\*1280 pixels, and different channels respectively mark the DNA, F-actin and B-  
601 tubulin. There are 12 mechanisms: Actin disruptors, Aurora kinase inhibitors, Cholesterol-  
602 lowering, DNA damage, DNA replication, Eg5 inhibitors, Epithelial, Kinase inhibitors,  
603 Microtubule destabilizers, Microtubule stabilizers, Protein degradation and Protein synthesis. The  
604 evaluation task requires the model to accurately predict the MoA of different treatments.

605

### 606 **Three modes for the profile of fully-imaged images.**

607 *Cell region cropping mode*. We utilized the generalist tool Cellpose on the easiest channel (such  
608 as the nucleus channel) to perform cell segmentation. For each image, following the acquisition of  
609 the segmentation mask, we extract all the (x, y) pixel coordinates of each cell, and compute the  
610 region of each cell as follows:

$$\begin{aligned}w &= x_{max} - x_{min} ; h = y_{max} - y_{min} \\x_c &= x_{min} + 0.5 * w ; y_c = y_{min} + 0.5 * h \\Rs &= \min(\max(w, h) * Rc, Sta * 0.5)\end{aligned}$$

$$\begin{aligned}bbox_0 &= \max(x_c - Rs, 0) ; bbox_1 = \max(y_c - Rs, 0) \\bbox_2 &= \min(x_c + Rs, W) ; bbox_3 = \min(y_c + Rs, H)\end{aligned}$$

611 where  $x_{max}, x_{min}, y_{max}, y_{min}$  denote the max/min x/y, respectively, among all the pixels  
612 coordinates;  $x_c, y_c$  denote the coordinates of centroid; Rc denotes the rescale constant (it is set by  
613 user according to the average size of cell bodies); Sta denotes the side length of cropped image  
614 (here we set it as 224, the input size of Microsnoop); Rs denotes the crop size (it cannot be more  
615 than half of Sta); W, H denote the width and height of the fully-imaged image, respectively.  
616  $bbox_0, bbox_1, bbox_2, bbox_3$  denote the left, up, right, down of the cropped region in the original  
617 image, respectively, and they cannot go beyond the boundaries of the image. Finally, single-cell  
618 images are cropped on all channels and padded to (c, Sta, Sta) with zero pixels if smaller, where c  
619 denotes the number of channels. The fully-imaged level embedding of the image is obtained by  
620 computing the mean of all single-cell image embeddings.

621

622 *Rescaling mode*. In the case that the height of the image is not equal to its width, the initial step is  
623 to pad the image with zeros to create a square shape. The fully-imaged images are then rescaled to  
624 input size using the resize function from the cv2 Python package. The fully-imaged level  
625 embedding of the image is directly obtained through this process.

626

527 *Tile mode.* The fully-imaged images are cropped into tiles using the `make_tiles` function from the  
528 `cellpose.transforms` Python package. The parameter `bsize` was set as the input size, and the  
529 parameter `tile_overlap` was set as 0.1. The fully-imaged level embedding of the image is obtained  
530 by computing the mean of all tile embeddings.

### 531 **Sphering transformation for the profile of batch-experiment images.**

532 The detailed description can be found in ref. <sup>47</sup>. Here, we fitted the `ZCA_corr` transformer  
533 from [https://github.com/jump-  
534 cellpainting/2021\\_Chandrasekaran\\_submitted/blob/main/benchmark/old\\_notebooks/utis.py](https://github.com/jump-cellpainting/2021_Chandrasekaran_submitted/blob/main/benchmark/old_notebooks/utis.py) on  
535 the embeddings of negative control, and then used the fitted transformer to correct the embeddings  
536 of each batch.

### 537 **Benchmarking.**

538 For BBBC021, we directly adopted the previously published state-of-the-art (SOTA) results  
539 from the curated resource at <https://bbbc.broadinstitute.org/BBBC021>. We also included the  
540 results of recently reported generalist methods. All results were formatted to two decimal places.

541 For other datasets, we compared with three generalist deep-learning methods:  
542 EfficientNetB0, Inception V3 and CytoImageNet. EfficientNetB0 was pretrained on the  
543 ImageNet and was included in the comparison in CytoImageNet. The famous project  
544 DeepProfiler<sup>47</sup> also used this network for the profiling of microscopy imaging data. Inception V3,  
545 which was also pre-trained on ImageNet, had been utilized in the MUSE project, a study of  
546 advanced multimodal algorithms. CytoImageNet, a recently published generalist microscopy  
547 image representation learning algorithm, was pre-trained using a self-constructed microscopy  
548 image classification dataset.

549 The results of EfficientNetB0 and CytoImageNet on COOS7 and CYCLOPs have been  
550 previously reported<sup>18</sup> and were directly adopted from the relevant publication. For BBBC048, we  
551 also included the custom algorithm results reported in the original paper. The remaining results  
552 presented in this paper were generated by the authors.

553 EfficientNetB0 and CytoImageNet were established using the `EfficientNetB0` class from  
554 the `tenorflow.keras.applications` Python package, with different weights loaded  
555 (`EfficientNetB0` used the ImageNet weights and `CytoImageNet` used the weights published by  
556 Stanley Bryan Z. Hua). Inception V3 was established using `inception_v3` class from the  
557 `torchvision.models` Python package. We dropped the last classification layer and used the  
558 remaining network for feature extraction. Because these network architectures are presented in  
559 natural RGB image study, at test time, each one-channel image is copied three times to mimic  
560 RGB images (also used in ref. <sup>18, 37</sup>). The other steps, such as data preprocessing and feature  
561 aggregation, are identical to those used in the Microsnoop protocol.

562 For LIVECell and TissueNet Test, we directly used the provided segmentation masks  
563 (nucleus channel for the TissueNet) without applying the cell segmentation algorithm in the cell  
564 region cropping mode. For the COOS7, CYCLOPs and BBBC021 datasets, the number of nearest  
565 neighbors (`k`) in the KNN classifier was set to 11, 11, and 1, respectively, in accordance with the  
566 ref. <sup>18</sup>. For BBBC048, the MLP was conducted using the `MLPClassifier` class from the  
567 `sklearn.neural_network` Python package, and the parameter `max_iter` was set as 1000.

### 570 **Joint use of Microsnoop and MUSE.**

571 In the simulation experiment, we utilized the `simulation_tool.multi_modal_simulator`  
572 function from the MUSE project to generate the transcriptional and image representations along  
573 with the corresponding ground truth. We used the adjusted Rand index (ARI)<sup>59</sup> to assess the  
574 ability of discovering true subpopulations. For the analysis of seqFISH+ data, the microscopy  
575 images were provided by the authors of the seqFISH+ paper. Each cell region of the images was  
576

577 determined by the coordinates of the cell centroid provided. We used Microsnoop and Inception  
578 V3 to conduct feature extraction on the Nissl and DAPI stained images separately. The shape of  
579 each single-cell embedding output was 512 (256\*2), then we used PCA to reduce the feature  
580 dimensionality to 500. The process of the transcript data was the same as MUSE. We used the  
581 silhouette coefficient to assess feature quality by the compactness of the clusters, which was  
582 conducted using the `silhouette_score` function from the `sklearn.metrics` Python package.  
583

## 584 **Graph plotting**

585 All bar graphs were plotted using GraphPad PRISM 8.0 software (GraphPad Software, Inc.,  
586 CA, USA). Fig. 1b(i) and Fig. 5a were created using resources from BioRender.com. The sources  
587 of images in Fig. 1 also included <https://www.rxr.ai/rxr2>, in addition to those listed in the  
588 supplementary Table 1 & 2. Some microscopy images in the figures have been processed using  
589 “Enhance Contrast...” from ImageJ<sup>60</sup> for better presentation.  
590

## 591 **Software and hardware**

592 The programming was conducted using Python v.3.7. Training and all evaluations were  
593 performed on NVIDIA GeForce RTX 3090 GPUs. The deep learning framework of Microsnoop  
594 used PyTorch<sup>61</sup> v.1.10.  
595

## 596 **Data availability**

597 The links to download the raw data of training set and evaluation datasets are provided in  
598 Supplementary Table 1-2. The new evaluation datasets generated by this study will be made  
599 available on figshare:  
700 [https://figshare.com/articles/dataset/Microsnoop\\_a\\_generalist\\_tool\\_for\\_the\\_unbiased\\_representation\\_of\\_heterogeneous\\_microscopy\\_images/22197607](https://figshare.com/articles/dataset/Microsnoop_a_generalist_tool_for_the_unbiased_representation_of_heterogeneous_microscopy_images/22197607) upon publication.  
701

702 SeqFISH+ mouse cortex dataset: Transcript data were downloaded from  
703 <https://github.com/CaiGroup/seqFISH-PLUS>. Image data were provided by the authors of the  
704 seqFISH+ paper.

705 All data in this study are available from the corresponding author upon reasonable request.  
706

## 707 **Code availability**

708 Source code for Microsnoop, including detailed tutorial, will be made available on GitHub  
709 (<https://github.com/cellimnet/microsnoop-publish>) upon publication. A configured Amazon  
710 Machine Image (AMI) will be made available upon publication for quickly and conveniently  
711 deploying Microsnoop for microscopy image analysis.  
712  
713



## 714 **Acknowledgments**

715 We thank L. Cai at Caltech for providing seqFISH+ image data. We thank W.K. Wang and L.  
716 Sun at Amazon Web Services China for their indispensable support in terms of computing  
717 resources and technology. We are grateful for the support from ZJU PII-Molecular Devices Joint  
718 Laboratory and support from "Medicine + X" interdisciplinary Center of Zhejiang University.  
719 This study was supported by National Key R&D Program of China (2021YFC1712905), National  
720 Natural Science Foundation of China (No. 82173941, No. 61872319), Key R&D Program of  
721 Zhejiang Province (No. 2023C01039). Y.W. was supported by the Innovation Team and Talents  
722 Cultivation Program of National Administration of Traditional Chinese Medicine (No.  
723 ZYYCXTD-D-202002).

## 725 **Author contributions**

726 Y.W., X.C.Z. and R.W. supervised the study, D.J.X. acquired data, established pipeline,  
727 conducted experiments and performed data analysis. D.J.X., Y.W., X.C.Z. and R.W. wrote the  
728 manuscript.

## 730 **Competing interests**

731 The authors declare no competing interests.

732

733 **Figures and Tables**

734

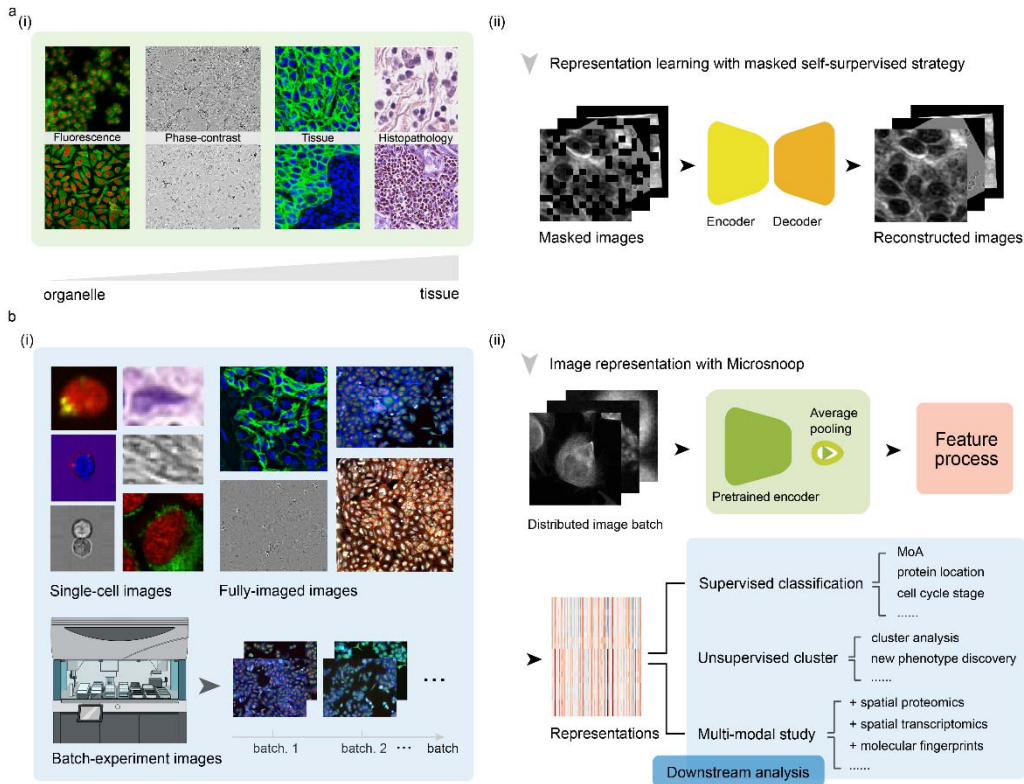

735

736

737

738

739

740

741

742

743

744

745

746

747

748

749

750

751

**Fig. 1 | Design of Microsnoop for microscopy image representation.** **a**, Schematic of the learning process. (i) Example of the four main category images are shown. The channels range from cellular organelles to tissues. (ii) A masked self-supervised learning strategy was employed and only images are required for training without additional manual annotation. One-channel masked images were set as the input and the Encoder-Decoder were required to reconstruct the original images. **b**, At test time, (i) Example images from various downstream tasks are shown, with different resolutions, number of channels and image types. These microscopy images are categorized into 3 types to ensure the broad coverage of image profiling needs. (ii) Application of Microsnoop. Firstly, images are managed by an in-built task distribution module (Fig. 3a), which generates one batch one-channel images for feature extraction. Each batch of images is fed into the pre-trained encoder, and the output smallest convolutional maps are processed by average pooling. Then, all extracted embeddings are processed according to different profiling tasks (introduced in the following section). The potential downstream analyses of our generalist representation tool are shown in the panel.

752

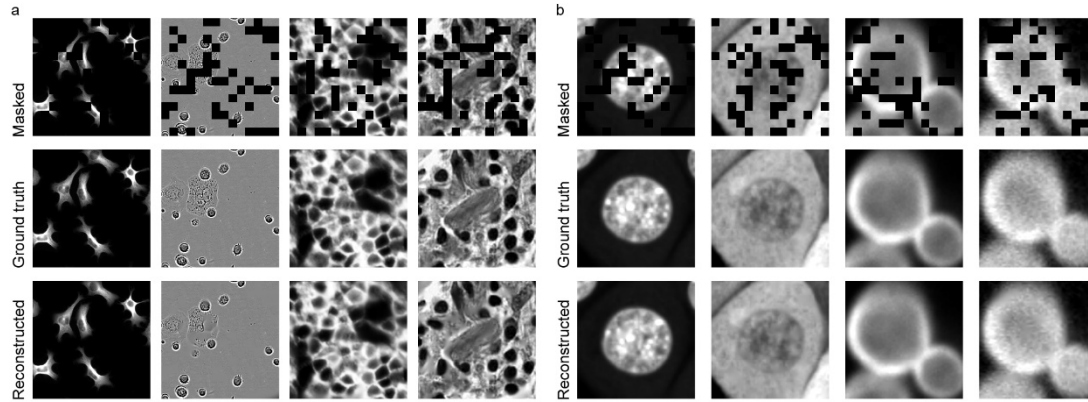

753

754

755

756

757

758

759

760

761

**Fig. 2 | Reconstruction results with Microsnoop. a**, Example results for images from the validation set, with a masking ratio of 25% applied on inputs. One representative image is selected for each image type. **b**, Example results for single-cell images from evaluated data, with a masking ratio of 25% applied on inputs. The left two columns are from COOS7 and the right two are from CYCLOPs. Two representative images (different imaging channels of the same cell) are selected for each dataset. Example results on other evaluated datasets are shown in Extended Data Figs. 4.

762

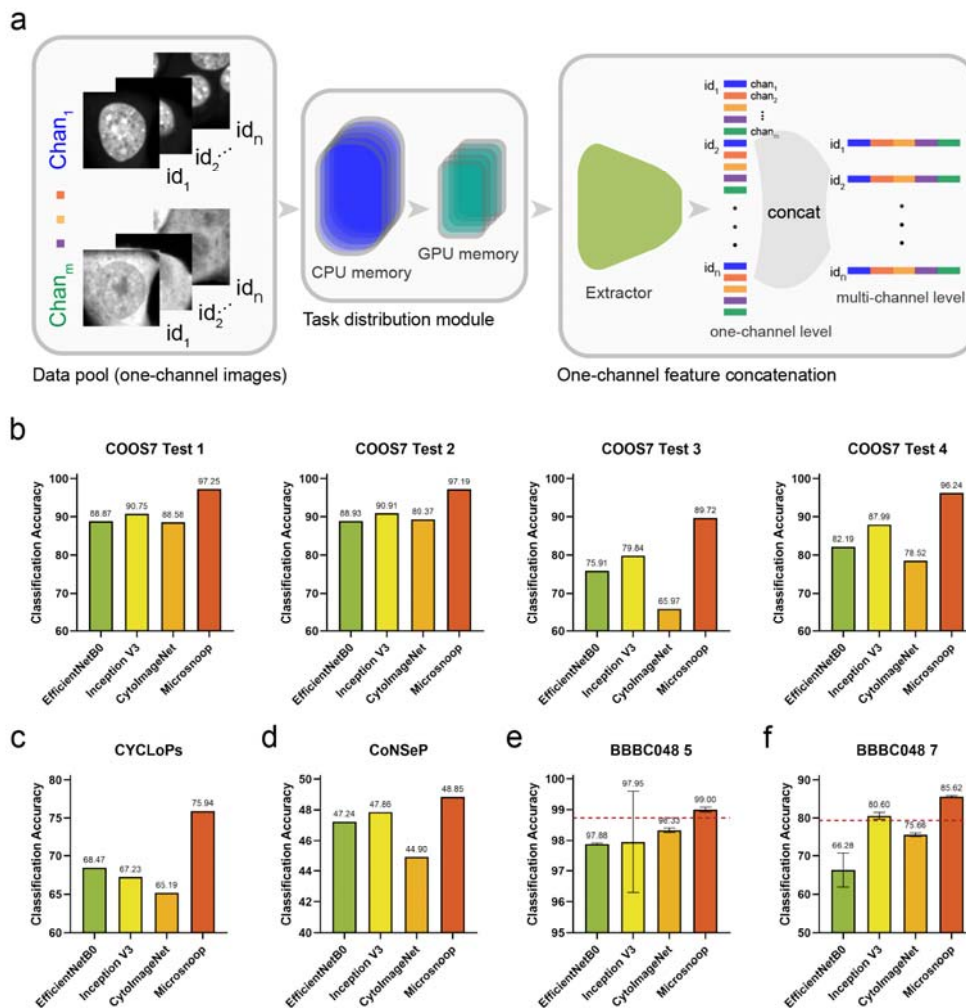

763

764

765

766

767

768

769

770

771

772

773

**Fig. 3 | Profiling with Microsnoop on single-cell images. a**, Pipeline. Every channel of the single-cell image is processed independently, and the one-channel level embeddings are concatenated to get multi-channel level image representations. A task distribution module is provided to prevent memory overflow. The Extractor denotes the pretrained encoder combined with the average pooling layer shown in Fig. 1a(ii). **b-f**, Benchmarks. **b**, Benchmark on COOS7, containing four separate test sets. **c**, Benchmark on CYCLoPs. **d**, Benchmark on CoNSEP. **e,f**, Benchmarks on BBBC048, with two different classification tasks. Performances reported by the original paper are shown with dotted red lines. Error bars represent the mean  $\pm$  SD of fivefold cross-validation results.

774

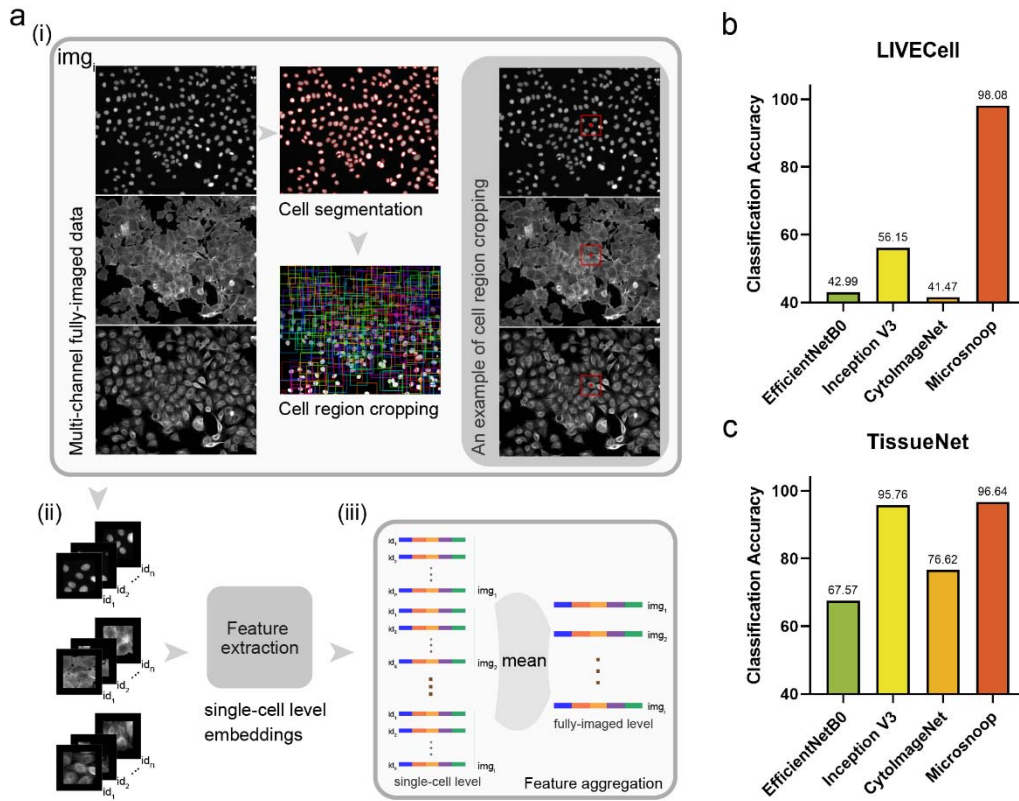

775  
776  
777  
778  
779  
780  
781  
782

**Fig. 4 | Profiling with Microsnoop on fully-imaged images. a,** Pipeline. (i) Cell segmentation algorithm is conducted on the easiest channel (such as the nucleus channel) of the multi-channel fully-imaged image, then the cell region for each single cell is computed and cropped. (ii) Multi-channel single-cell images are processed as Fig. 3a, and (iii) the output single-cell level embeddings are aggregated to obtain the fully-imaged level image representations. **b,** Benchmark on LIVECell. **c,** Benchmark on TissueNet.

783

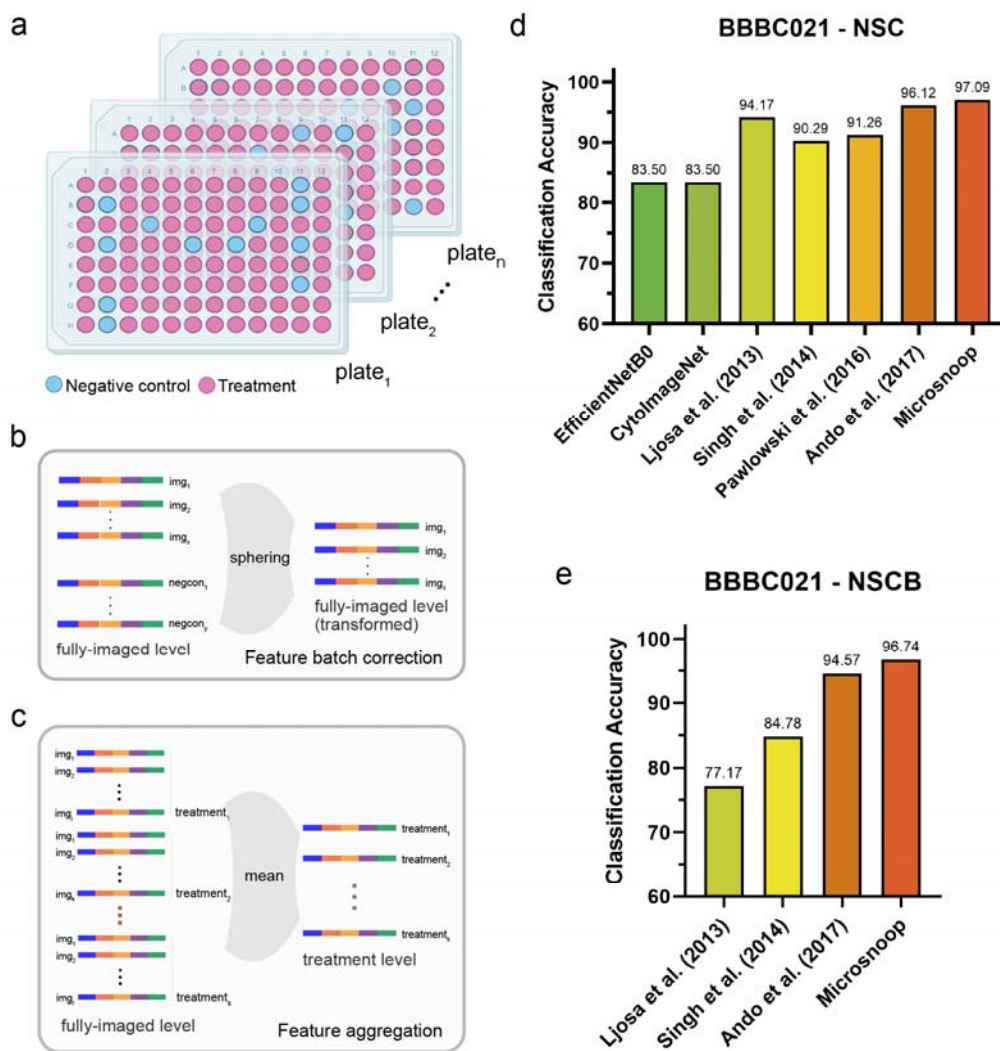

784  
785  
786  
787  
788  
789  
790  
791

**Fig. 5 | Profiling with Microsnoop on batch-experiment images. a**, Schematic of multi-well plates in a drug screening experiment containing negative control wells and different treatment wells set in each plate. **b**, Batch correction on fully-imaged level representations. **c**, Feature aggregation on fully-imaged level embeddings to obtain treatment level image representations. **d,e**, Benchmark on BBBC021, with different evaluation metrics.

792

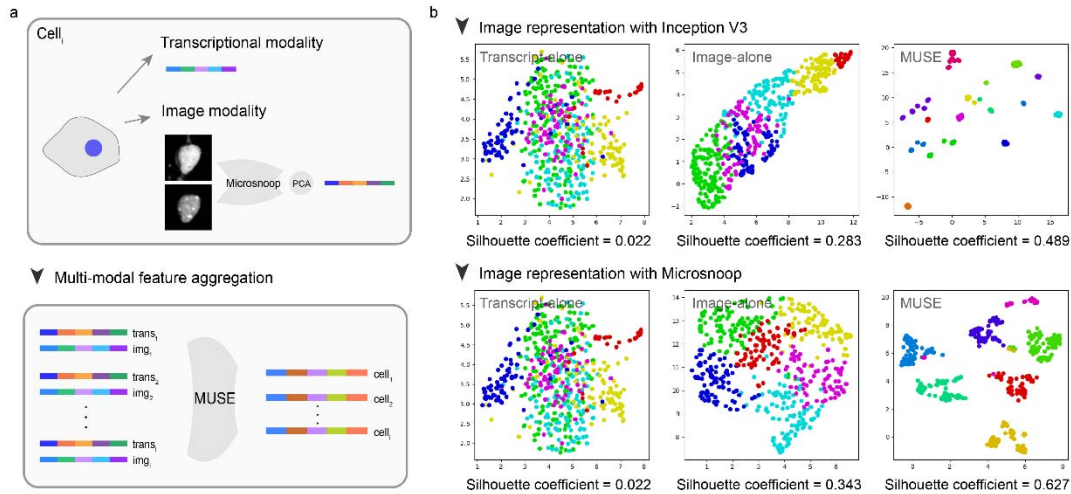

793  
794  
795  
796  
797  
798  
799  
300

**Fig. 6 | Joint use of Microsnoop and MUSE.** **a**, Pipeline. Image modality data is first processed by Microsnoop, then PCA is performed on the output representations to reduce feature dimensionality. Finally, two modality representations are mixed by MUSE. **b**, UMAP visualization of different modality latent spaces on seqFISH+, using two different image representation methods. Silhouette score was used to quantify the separateness of clusters.

301 **Extended Data**

302

303

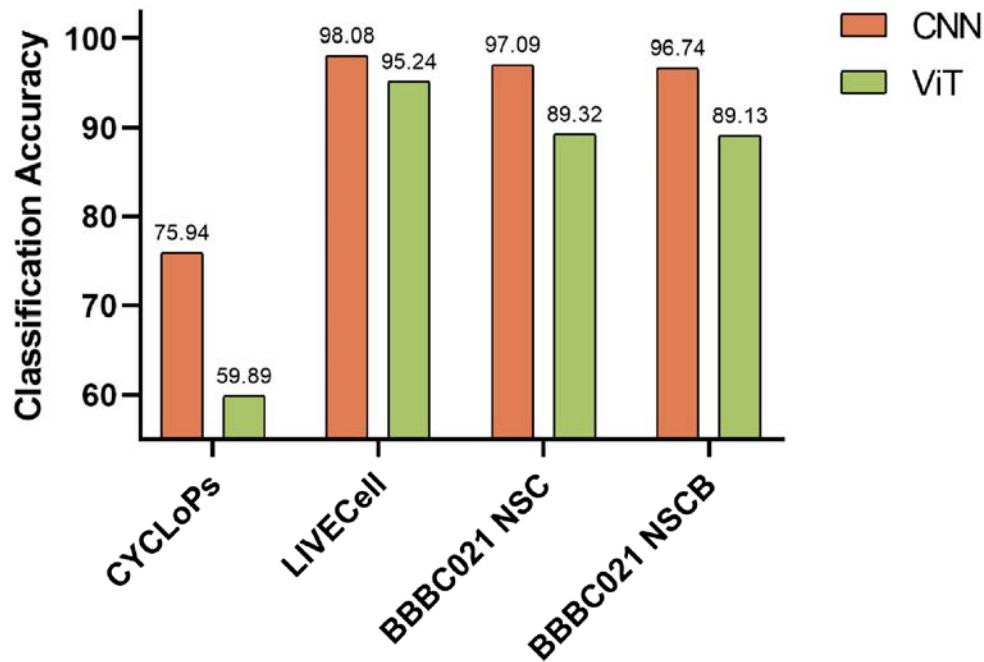

304

305

306

307

308

309

310

**Extended Data Fig. 1 | Performance evaluation of Microsnop trained with different network architectures.** Three representative datasets from seven evaluation datasets were selected for the early trials: single-cell image task (CYCLOPs), fully-imaged image task (LIVECell), and batch-experiment image task (BBBC021). The ViT architecture referred to the MAE, and the classification accuracy for the corresponding dataset was reported.



311

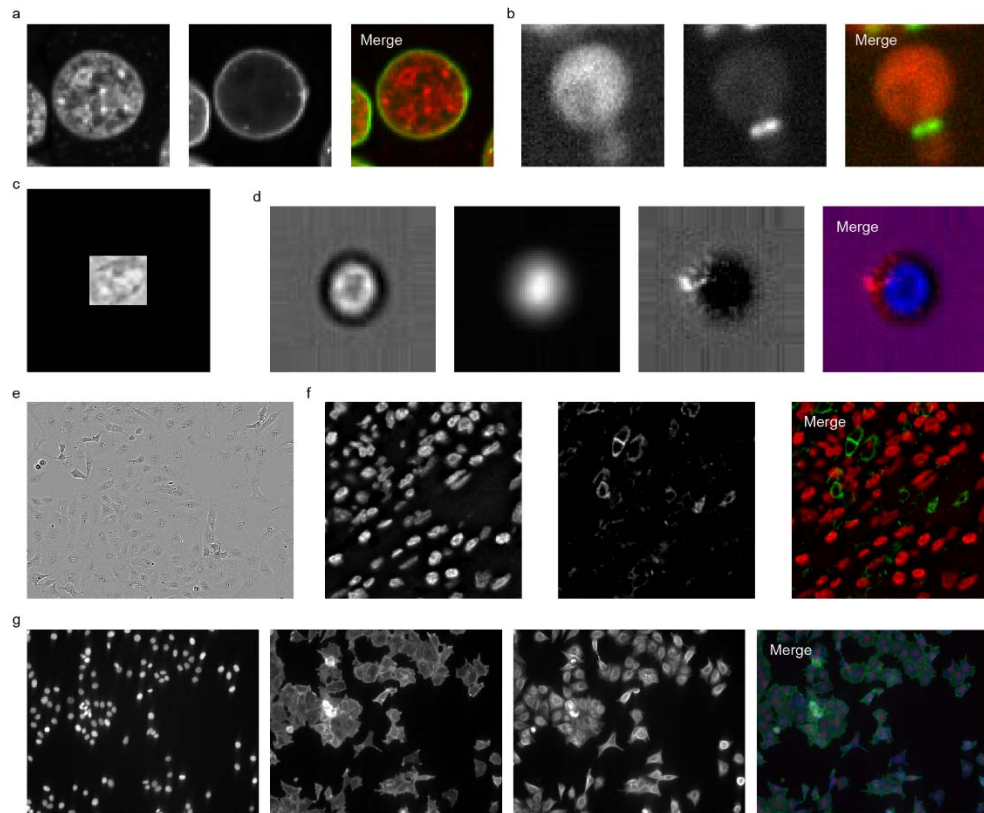

312  
313  
314  
315  
316

**Extended Data Fig. 2 | Example images of evaluation datasets.** Each channel of the example image was presented for each dataset: **a**, COOS7 **b**, CYCLoPs **c**, CoNSeP **d**, BBBC048 **e**, LIVECell **f**, TissueNet **g**, BBBC021.

317

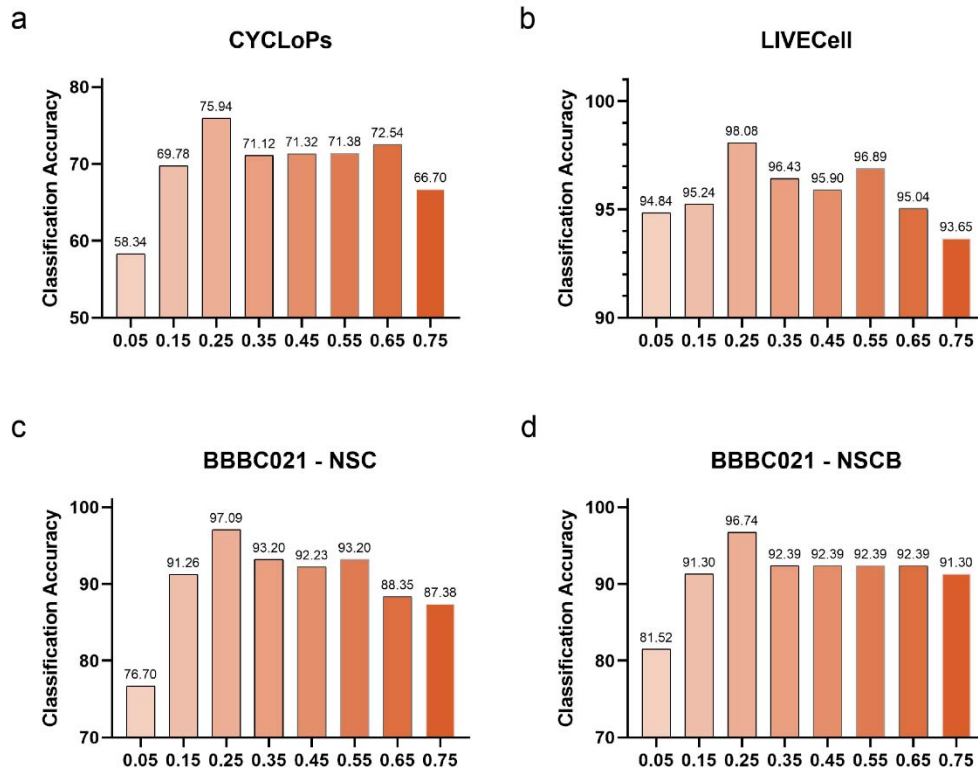

318

319

320

321

322

323

324

**Extended Data Fig. 3 | Performance evaluation of Microsnop trained with different mask ratios.** Three representative datasets from seven evaluation datasets were selected for the early trials: **a**, Single-cell image task **b**, Fully-imaged image task **c,d**, Batch-experiment image task. The mask ratio was set ranging from 0.05 to 0.75, and the classification accuracy for the corresponding dataset was reported.

325

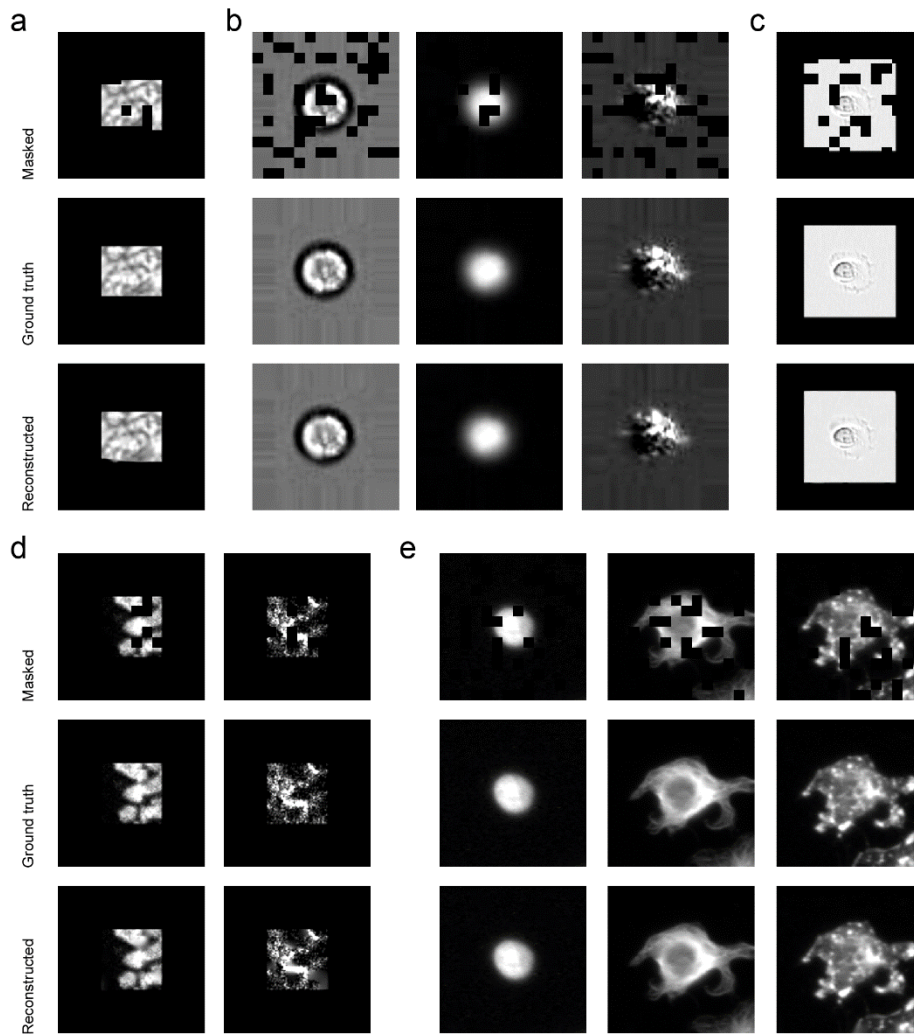

326  
327  
328  
329  
330  
331  
332

**Extended Data Fig. 4 | Reconstruction results with Microsnoop on the remaining evaluation datasets.** Each channel of the example images from each dataset were performed: **a**, CoNSeP **b**, BBBC048 **c**, LIVECell **d**, TissueNet **e**, BBBC021. For fully-imaged image datasets (**c-e**), the processed single-cell images after cell region cropping were used.



343

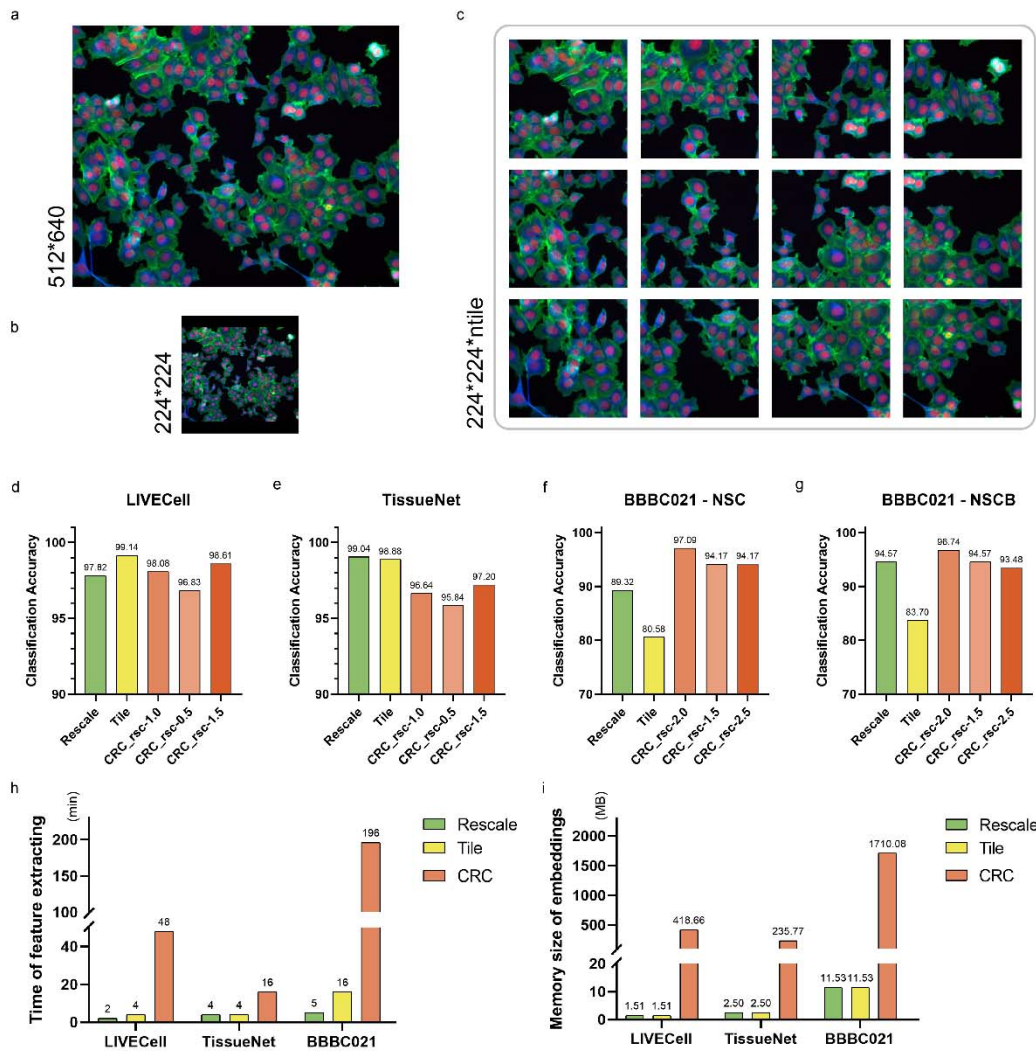

344  
345  
346  
347  
348  
349  
350  
351  
352  
353  
354  
355

**Extended Data Fig. 6 | Different profile modes of fully-imaged images. a**, An example image. **b**, Example of the rescaling mode, where the original image was patched and rescaled to the input size (224\*224). **c**, Example of the tile mode, where the original image is cropped to many 224\*224 tiles (ntile) using the make\_tiles function from the cellpose.transforms Python package, and the tile\_overlap parameter was set as 0.1. **d-g**, Performance comparison of different modes on three evaluation datasets: **d**, LIVECell **e**, TissueNet **f,g**, BBBC021. The cell region cropping mode (CRC) was tested with different rescale constant to study the robustness. **h,i**, Time (**h**) and memory (**i**) cost of different modes. In the case of CRC mode, the memory cost computes the representations of all single-cell images, rather than the final fully-imaged level image representation.

356

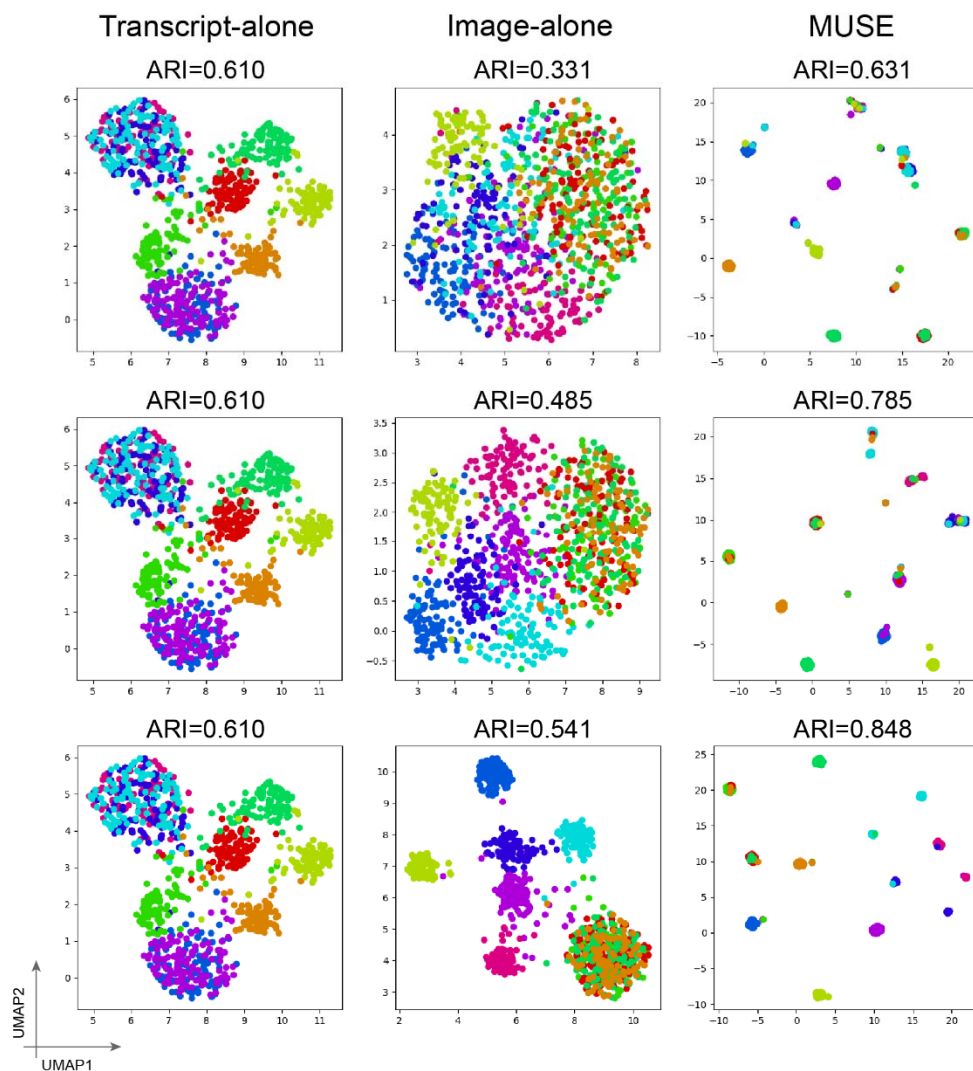

357  
358  
359  
360

**Extended Data Fig. 7 | UMAP visualizations of latent embeddings from single- and combined-modality methods.** Colors: ground truth subpopulation labels in simulation. Cluster accuracy is quantified using the adjusted Rand index (ARI).
